# Supplementary material
Source: MDPI journal article supplement (https://www.mdpi.com/2072-4292/14/11/2706)
Supplement: s1 [file s1]

# Attribution of NDVI Dynamics over the Globe from 1982 to 2015

Cuiyan Liu <sup>1,2</sup>, Jianyu Liu <sup>1,2,\*</sup>, Qiang Zhang <sup>3,4,5</sup>, Hui Ci <sup>6</sup>, Xihui Gu <sup>7</sup> and Aminjon Gulakhmadov <sup>8,9</sup>

- <sup>1</sup> Laboratory of Critical Zone Evolution, School of Geography and Information Engineering, China University of Geosciences, Wuhan 430074, China; liucy@cug.edu.cn
- <sup>2</sup> State Key Laboratory of Hydrology-Water Resources and Hydraulic Engineering, Nanjing Hydraulic Research Institute, Nanjing 210098, China
- <sup>3</sup> Key Laboratory of Environmental Change and Natural Disaster, Ministry of Education, Beijing Normal University, Beijing 100875, China; zhangq68@bnu.edu.cn
- <sup>4</sup> State Key Laboratory of Earth Surface Processes and Resource Ecology, Beijing Normal University, Beijing 100875, China
- <sup>5</sup> Faculty of Geographical Science, Academy of Disaster Reduction and Emergency Management, Beijing Normal University, Beijing 100875, China
- <sup>6</sup> School of Urban, Resource and Environmental Sciences, Jiangsu Second Normal University, Nanjing 211200, China; cathyyyci@163.com
- <sup>7</sup> Department of Atmospheric Science, School of Environmental Studies, China University of Geosciences, Wuhan 430074, China; guxh@cug.edu.cn
- <sup>8</sup> Research Center of Ecology and Environment in Central Asia, Xinjiang Institute of Ecology and Geography, Chinese Academy of Sciences, Urumqi 830011, China; aminjon@ms.xjb.ac.cn
- <sup>9</sup> Institute of Water Problems, Hydropower and Ecology of the National Academy of Sciences of Tajikistan, Dushanbe 734042, Tajikistan
- \* Correspondence: liujy@cug.edu.cn

## Contents of this file

Figures S1 to S6

## Introduction

In this document, we provide expanded figures documenting relationships summarized in the article text.

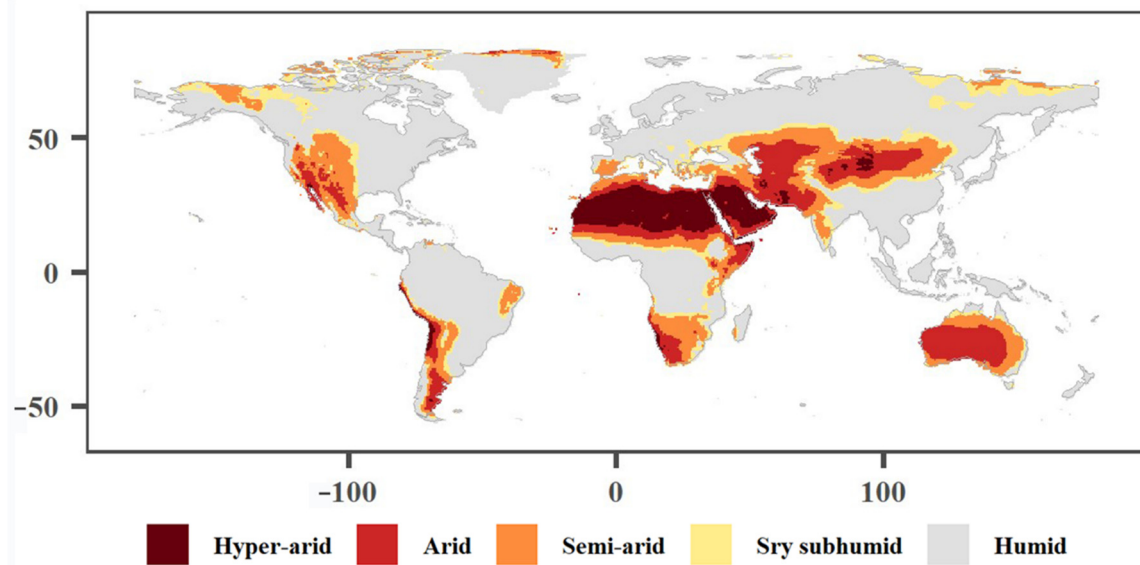

**Figure S1.** Global distribution of dry and wet regions. The climatic regions are classified by the aridity index for 1982–2015, based on the precipitation and potential evapotranspiration data from Climatic Research Unit.

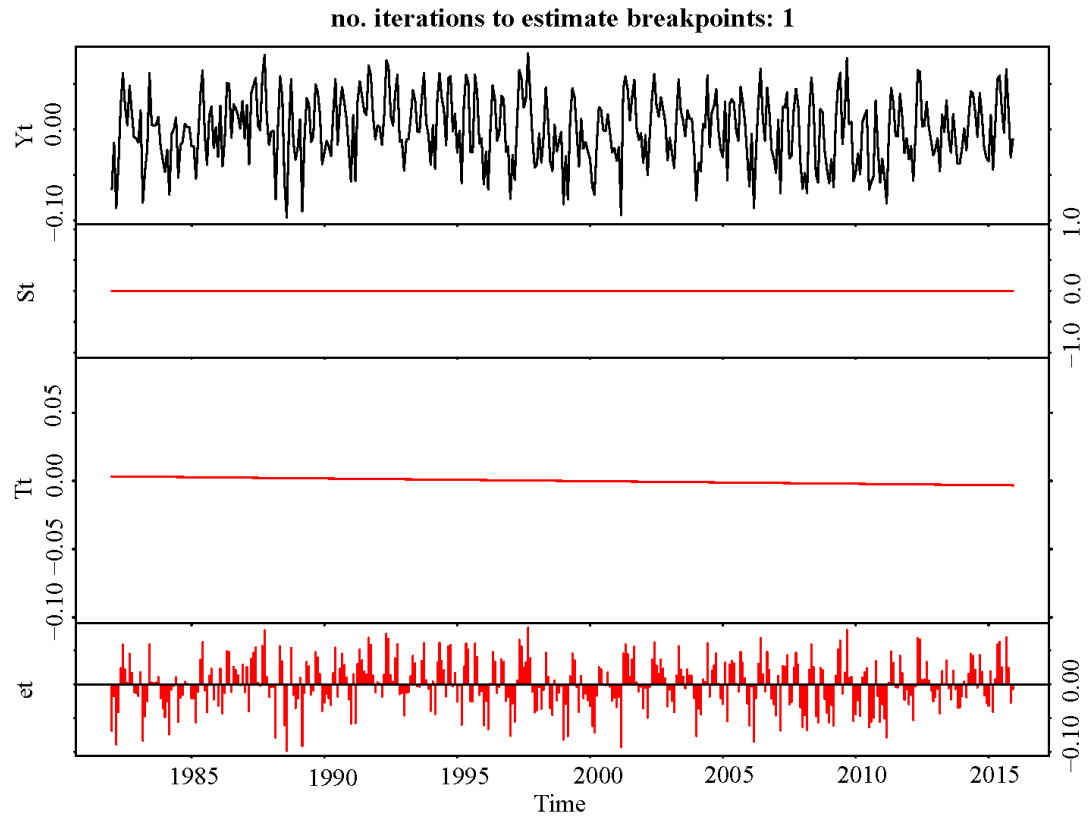

**Figure S2.** Global NDVI time series where the breakpoint is detected.  $Y_t$ ,  $S_t$ ,  $T_t$ , and  $e_t$  indicates the raw data, the fitted seasonal cycle, the trend component, and the BFAST residuals, respectively.

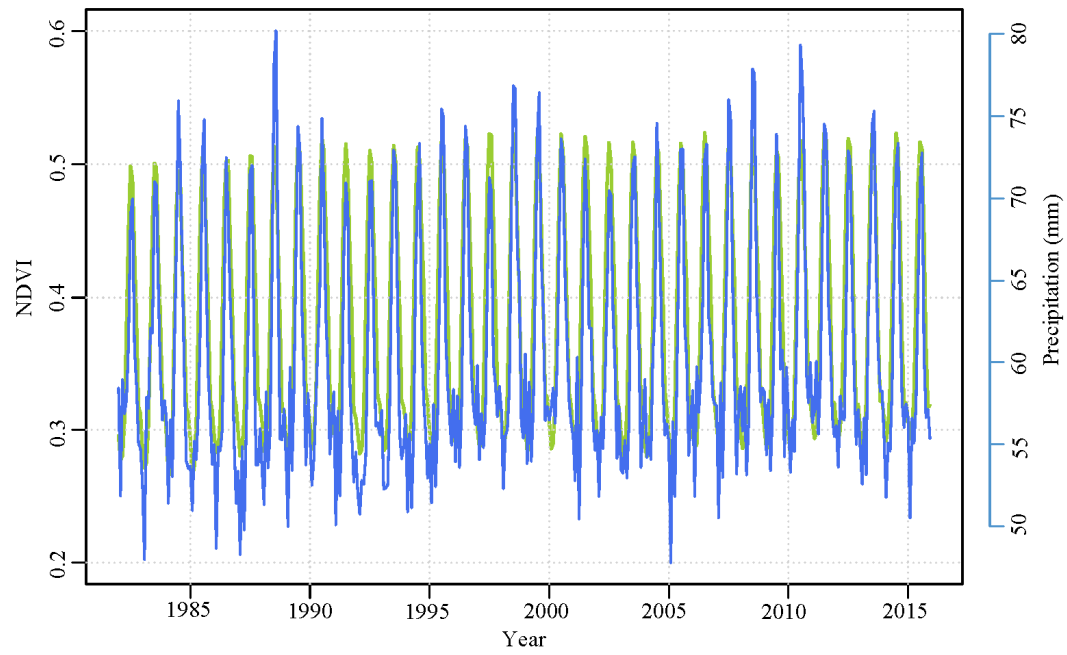

**Figure S3.** Time series of the NDVI and precipitation for the period 1982–2015.

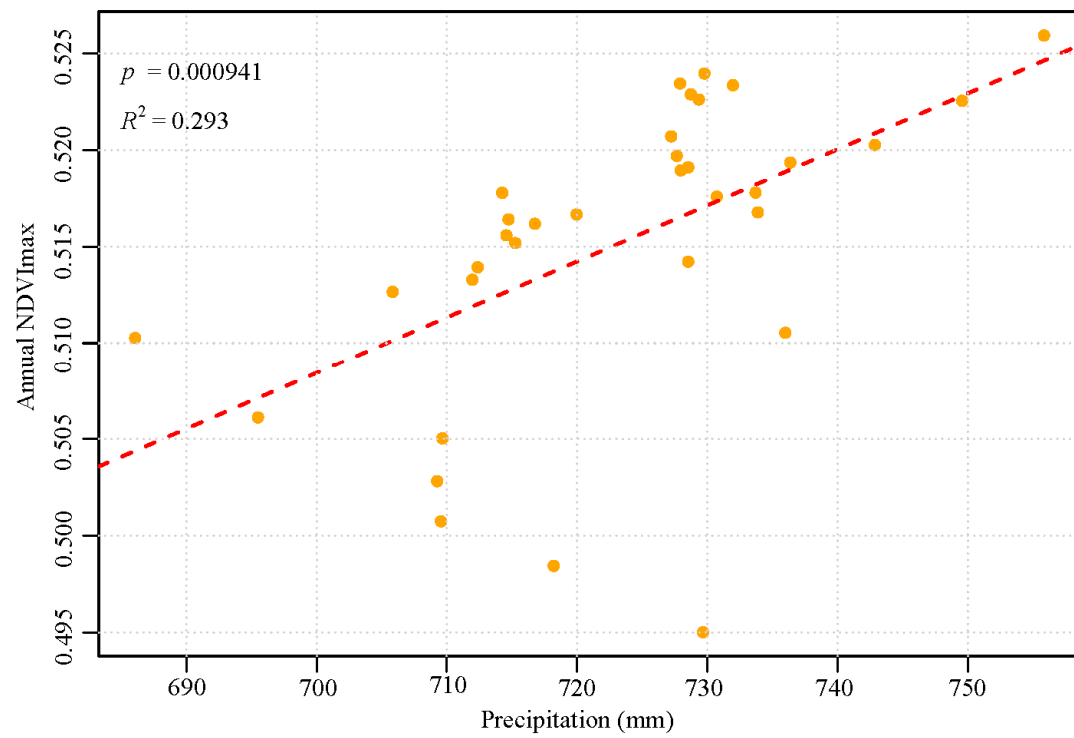

**Figure S4.** The change in the vegetation-precipitation relationship (VPR).

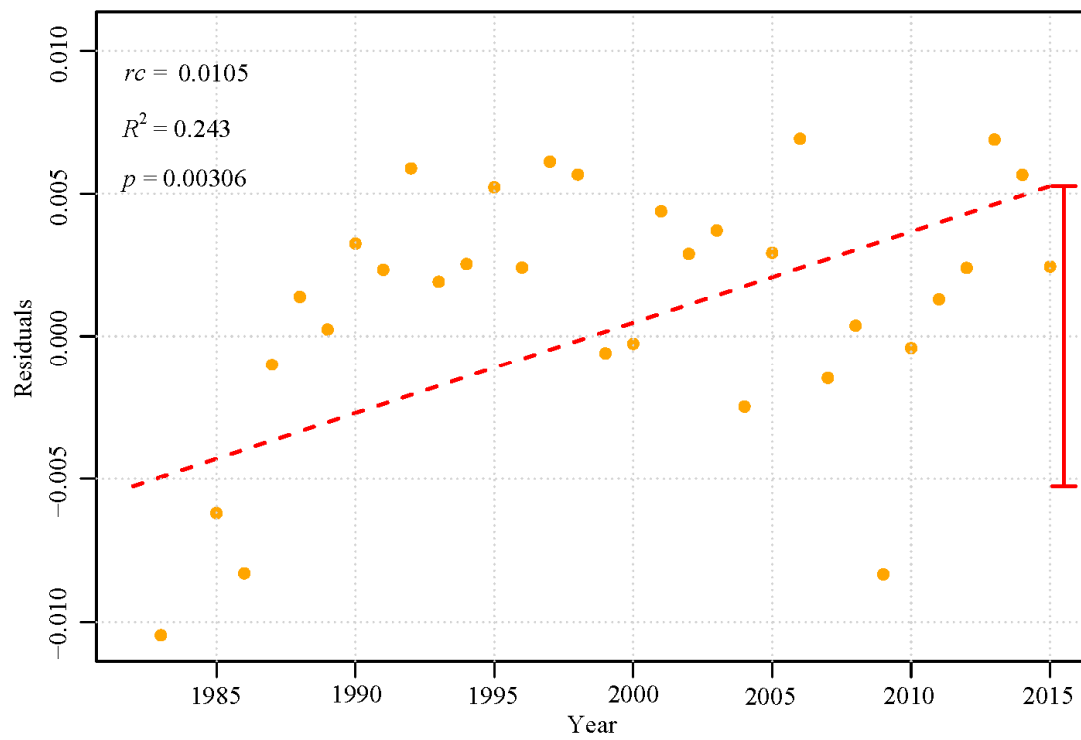

**Figure S5.** The segmented RESTREND applied using the segmented VPR. The residual change is indicated by the red bar ( $rc = 0.0105$ ).

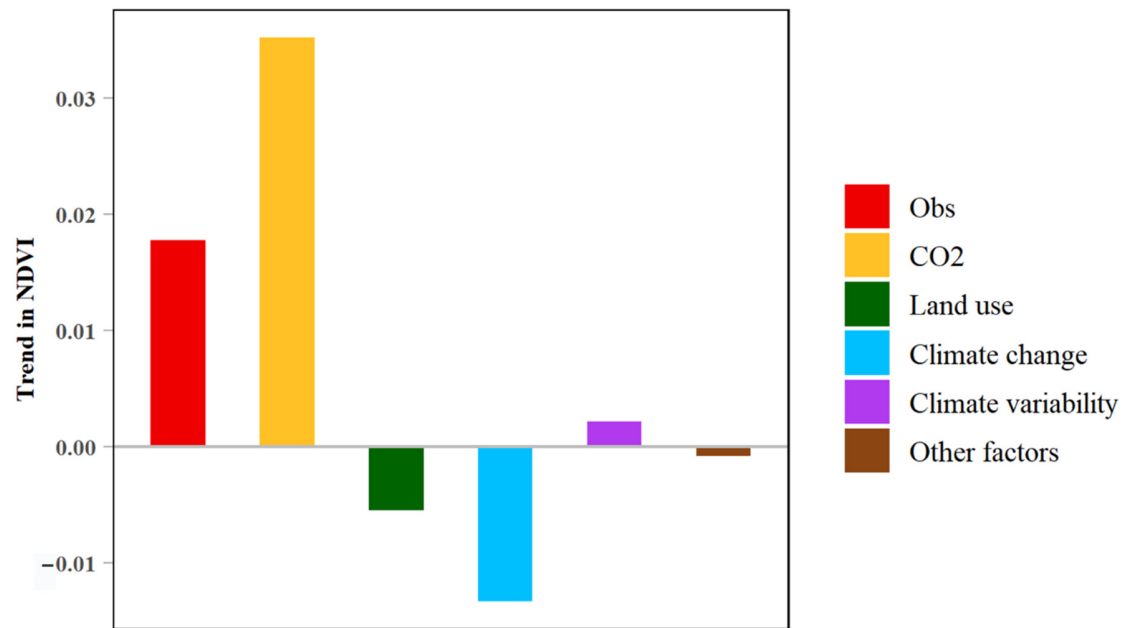

**Figure S6.** The mean contributions of driving factors on NDVI changes for the period 1982–2015.
